# Supplementary material for: PhageDive: the comprehensive strain database of prokaryotic viral diversity
Source: PubMed Central journal article supplement (PMC11701545; doi:10.1093/nar/gkae878), 2024-10-07
Supplement: gkae878_supplemental_file.pdf [file gkae878_supplemental_file.pdf]

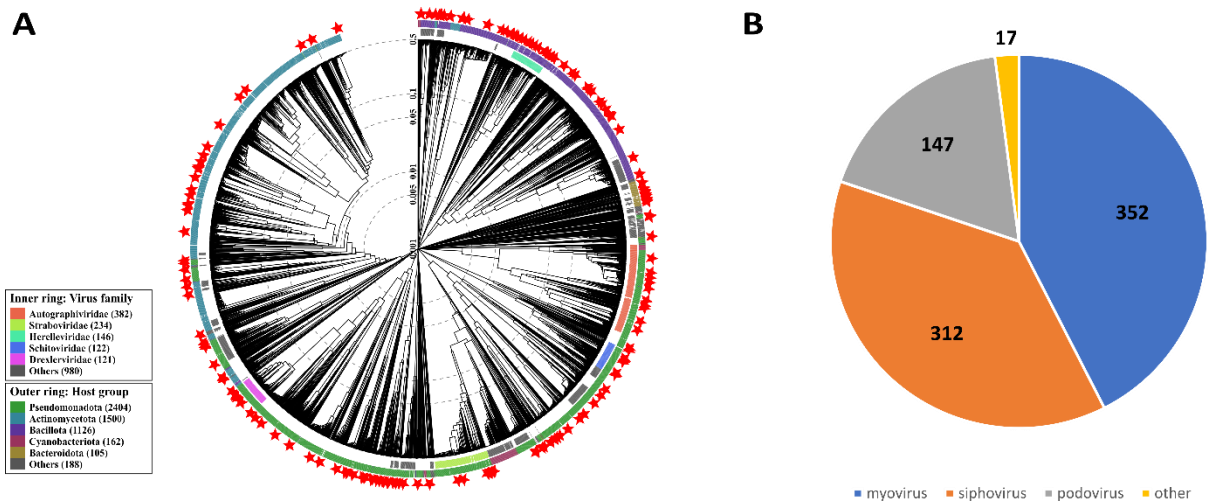

Figure S1. Overview of the phage diversity covered in *PhageDive* in terms of phage and host taxonomy (A) and morphology (B). (A) Single members of officially classified ICTV genera included in *PhageDive* are marked by stars using ViPTree. Viral families are coloured in the inner ring, host phyla are coloured on the outer ring. (B) Distribution of morphotypes among the phages in *PhageDive* with available information on morphology.
